# Supplementary material
Source: PubMed Central journal article supplement (PMC8592057)
Supplement: NIHMS1746063-supplement-supplementary_materials.pdf [file NIHMS1746063-supplement-supplementary_materials.pdf]

## Supporting information for:

# Peptide Correlation Analysis (PeCorA) Reveals Differential Proteoform Regulation

**Maria Dermit<sup>1</sup>, Trenton M. Peters-Clarke<sup>2</sup>, Evgenia Shishkova<sup>3,4</sup>, Jesse G. Meyer<sup>4,5</sup> \***

<sup>1</sup>Centre for Cancer Cell and Molecular Biology, Barts Cancer Institute, Queen Mary University of London, Charterhouse square, London EC1M 6BQ, United Kingdom

<sup>2</sup>Department of Chemistry, University of Wisconsin-Madison, Madison, Wisconsin 53706, United States

<sup>3</sup>National Center for Quantitative Biology of Complex Systems, Madison, Wisconsin 53706, United States

<sup>4</sup>Department of Biomolecular Chemistry, University of Wisconsin-Madison, Madison, Wisconsin 53706, United States

<sup>5</sup>Department of Biochemistry, Medical College of Wisconsin, 8701 Watertown Plank Rd. Milwaukee, WI 53226

\*Correspondence to: [jessegmeyer@gmail.com](mailto:jessegmeyer@gmail.com)

### Table of Contents:

|           |                          |
|-----------|--------------------------|
| Figure S1 | page S-2                 |
| Figure S2 | page S-3                 |
| Table S1  | supplementary components |

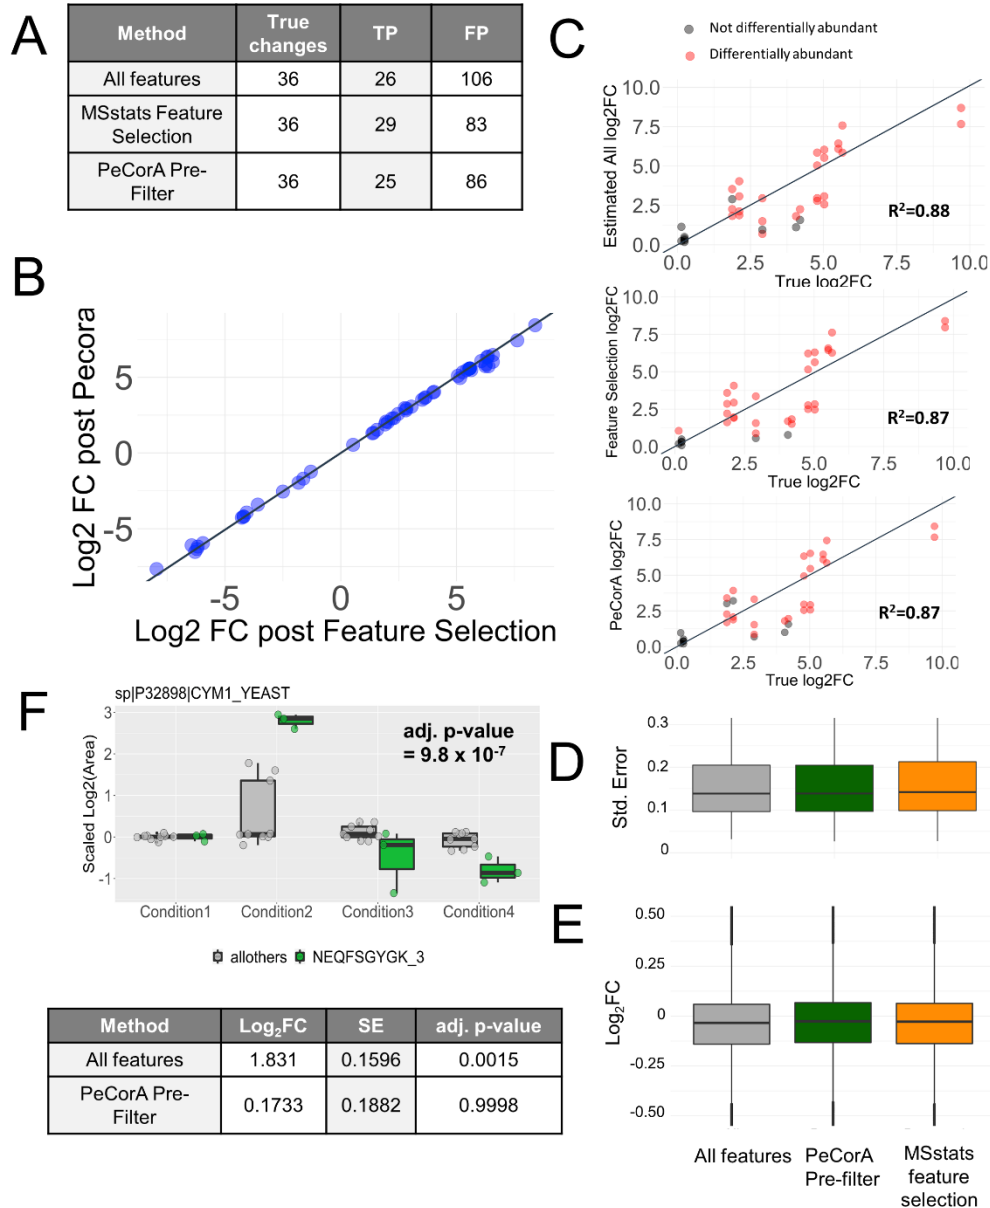

**Supplementary Figure 1: PeCorA as a peptide filter before protein quantitation using a benchmark dataset.** (A) Summary of the iPRG dataset true positive (TP) and false positive (FP) protein changes detected using all peptide features or the two feature filtration methods. (B) Protein quantities of the 53 significant protein changes (not restricted to spiked-in proteins, FDR<0.01) detected from either of the two feature selection methods shows almost identical performance. PeCorA pre-filtration (y-axis) or MSstats feature selection (x-axis). (C) Regression plots of each method (y-axes) versus the true values based on the amount spiked-in (x-axes). (D) Standard errors and (E) log<sub>2</sub>(fold change) for all protein comparisons between the three methods show that PeCorA pre-filtering performs similar to MSstats feature selection. (F) Example protein P32898 from the iPRG benchmark. PeCorA identifies one outlier feature for that protein (Peptide NEQFSGYGK). Table below: quantification of P32898 by MSstats using all the features or after PeCorA filtration of the poorly quantified feature.

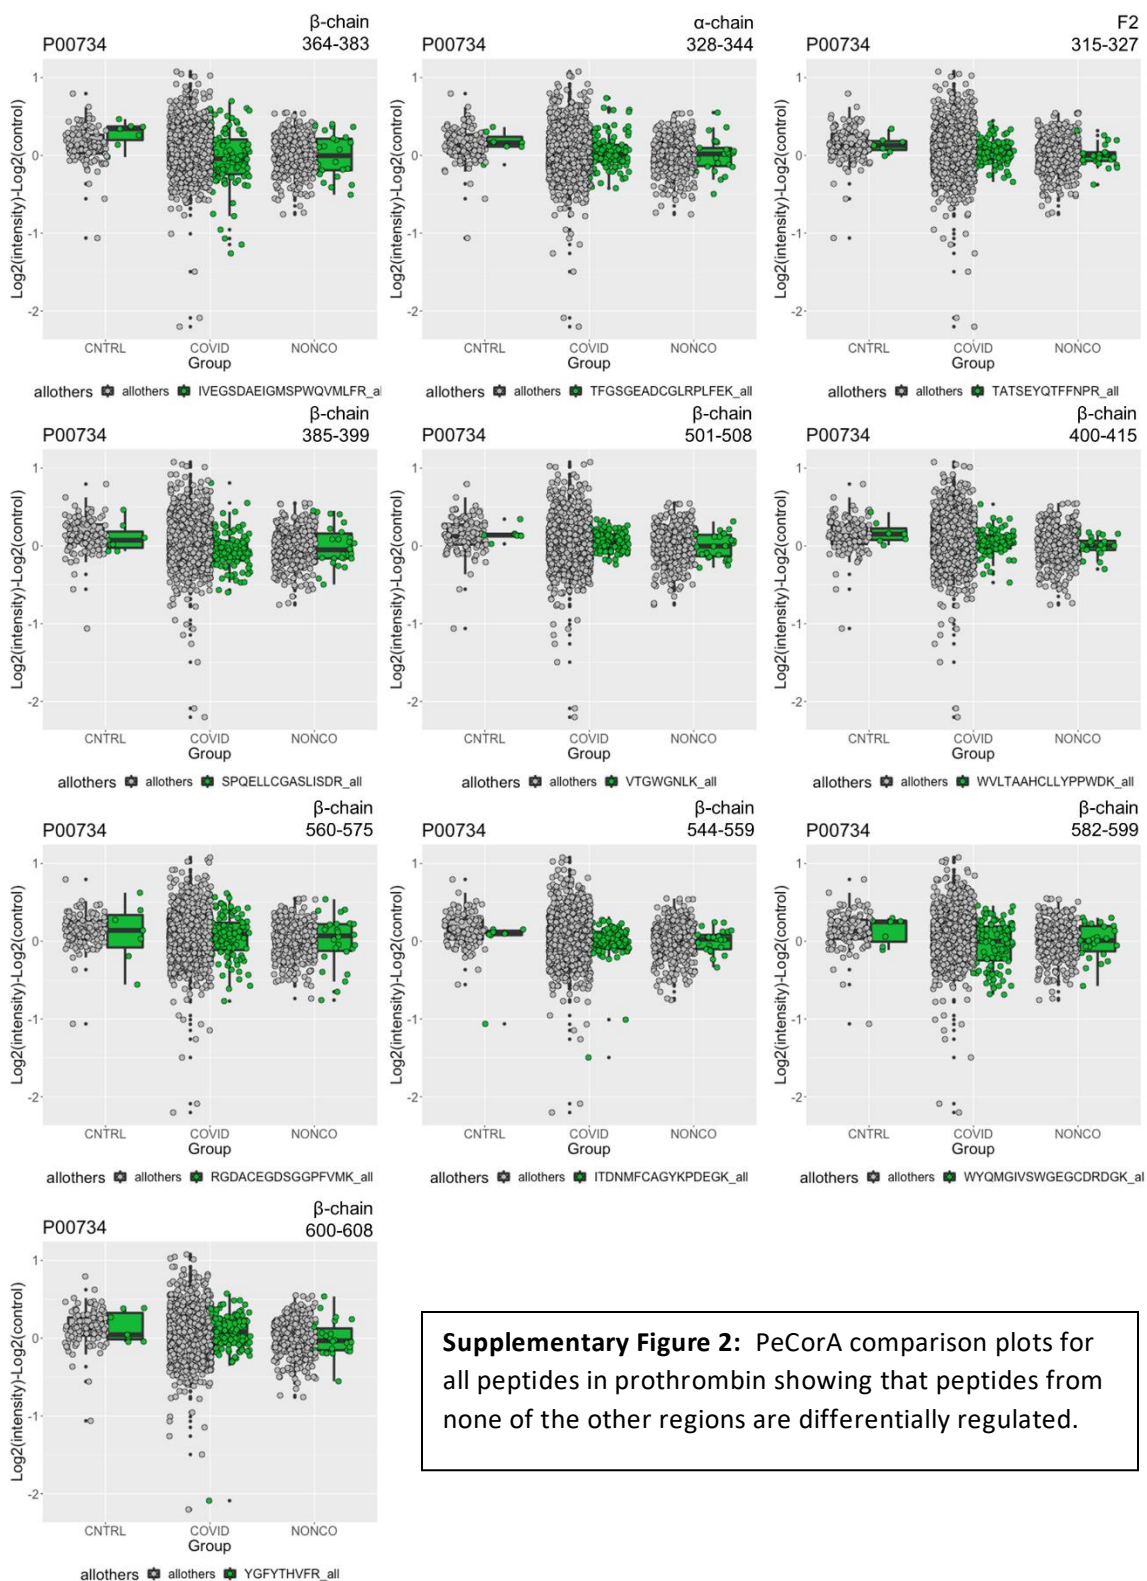

**Supplementary Figure 2:** PeCorA comparison plots for all peptides in prothrombin showing that peptides from none of the other regions are differentially regulated.
